# Supplementary material for: Isolation of first row transition metal-carboxylate zwitterions
Source: Royal Society of Chemistry journal article supplement (doi:10.1039/c5ra05564d), 2015-01-01
Supplement: c5ra05564d1.pdf [file c5ra05564d1.pdf]

Electronic Supplementary Information

## Isolation of First Row Transition Metal–Carboxylate Zwitterions

Mahsa Armaghan, W. Y. James Lu, Di Wu, Yao Wei, Feng-Ling Yuan, Seik Weng Ng, Mostafa M.

Amini, Wen-Hua Zhang,\* David J. Young,\* T. S. Andy Hor\* and Jian-Ping Lang

### Table of Contents

**Fig. S1** Structure of *trans*-Co(*iso*-hmnH)<sub>2</sub>(H<sub>2</sub>O)<sub>2</sub> (**3**) (a), *trans*-Ni(*iso*-hmnH)<sub>2</sub>(H<sub>2</sub>O)<sub>2</sub> (**4**) (b), *cis*-Ni(hmnH)<sub>2</sub>(H<sub>2</sub>O)<sub>2</sub> (**5**) (c), *trans*-Co(3,2,4-hpbH)(H<sub>2</sub>O)<sub>2</sub> (**15**) (d) and *trans*-Ni(3,2,4-hpbH)(H<sub>2</sub>O)<sub>2</sub> (**16**) (e) with labeling schemes. Selected C–O bond distances: O2–C7 1.244(1) Å, O3–C7 1.246(1) Å (**3**); O2–C7 1.238(1) Å, O3–C7 1.244(1) Å (**4**); O2–C7 1.230(2) Å, O3–C7 1.271(1) Å (**5**); O2–C13 1.249(4) Å, O3–C13 1.262(4) Å (**15**) and O2–C13 1.267(5) Å, O3–C13 1.249(5) Å (**16**). 3

**Fig. S2** Experimental (black) and simulated (red) powder X-ray diffraction (PXRD) pattern for [Cu(hmnH)<sub>2</sub>·DMF·H<sub>2</sub>O]<sub>n</sub> (**8**). ..... 4

**Fig. S3** TGA curves for [Cu(hmnH)<sub>2</sub>·DMF·H<sub>2</sub>O]<sub>n</sub> (**8**). ..... 4

**Fig. S4** Cell packing diagrams of *trans*-Zn(*iso*-hmnH)<sub>2</sub>(H<sub>2</sub>O)<sub>2</sub> (**1**) (a), *cis*-Zn(hmnH)<sub>2</sub>(H<sub>2</sub>O)<sub>2</sub>·2H<sub>2</sub>O (**2**) (b), *cis*-Zn(4,2,4-hpbH)<sub>2</sub>(H<sub>2</sub>O)<sub>2</sub> (**12**) (c), *trans*-Zn(3,2,4-hpbH)<sub>2</sub>(H<sub>2</sub>O)<sub>2</sub> (**13**) (d) and *cis*-Zn(4,6,3-hpbH)<sub>2</sub>(H<sub>2</sub>O)<sub>2</sub>·H<sub>2</sub>O (**14**) (e) showing intensive hydrogen bonding interactions among these zwitterions. .... 6

**Fig. S5** Crystal structure of [Mn(4,6,3-hpbH)<sub>2</sub>]<sub>n</sub> (**17**) looking along the *b* direction showing, a) two adjacent layers (orange and bamboo) associated by hydrogen bonding interactions and b) cell packing diagrams..... 7

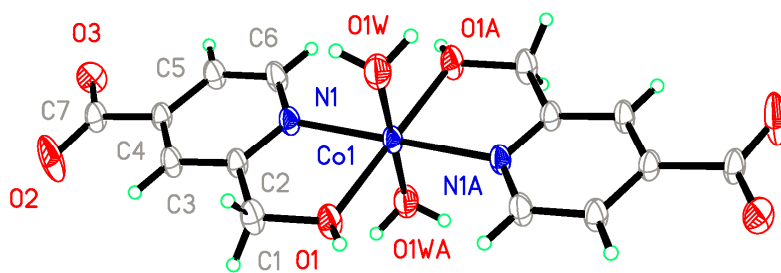

(a)

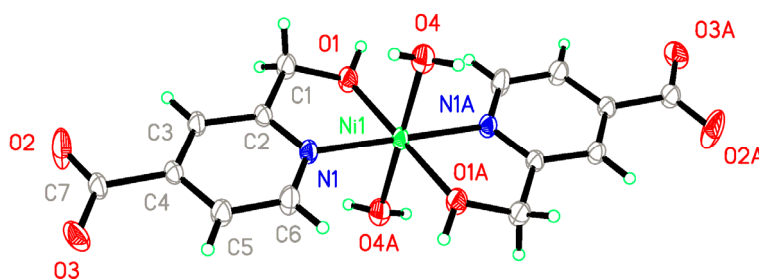

(b)

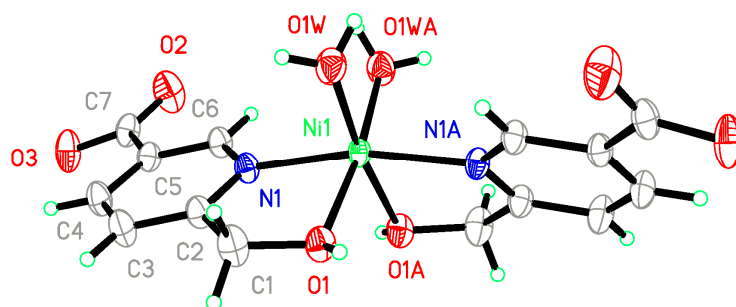

(c)

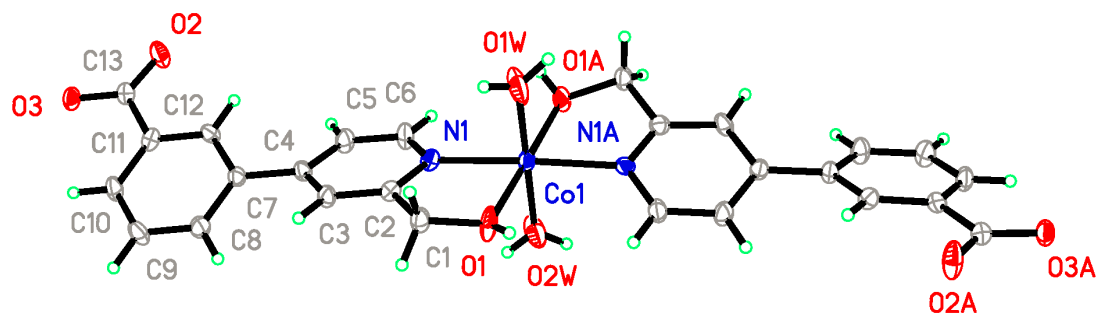

(d)

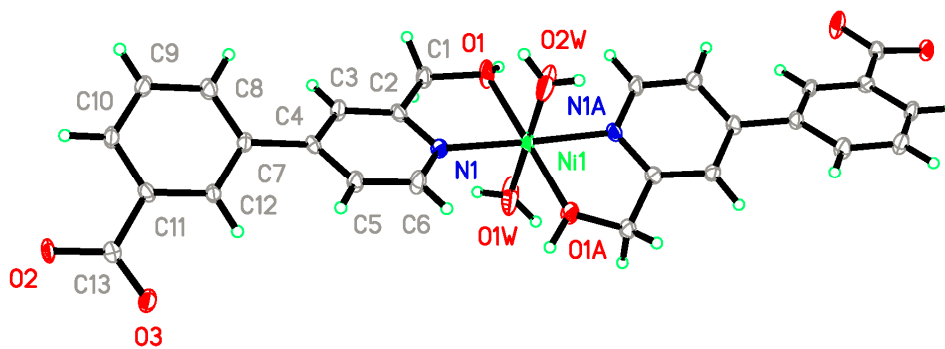

(e)

**Fig. S1** Structure of *trans*-Co(*iso*-hmnH)<sub>2</sub>(H<sub>2</sub>O)<sub>2</sub> (**3**) (a), *trans*-Ni(*iso*-hmnH)<sub>2</sub>(H<sub>2</sub>O)<sub>2</sub> (**4**) (b), *cis*-[Ni(hmnH)<sub>2</sub>(H<sub>2</sub>O)<sub>2</sub>]-2H<sub>2</sub>O (**5**) (c), *trans*-Co(3,2,4-hpbH)(H<sub>2</sub>O)<sub>2</sub> (**15**) (d) and *trans*-Ni(3,2,4-hpbH)(H<sub>2</sub>O)<sub>2</sub> (**16**) (e) with labeling schemes. Selected C–O bond distances: O2–C7 1.244(1) Å, O3–C7 1.246(1) Å (**3**); O2–C7 1.238(1) Å, O3–C7 1.244(1) Å (**4**); O2–C7 1.230(2) Å, O3–C7 1.271(1) Å (**5**); O2–C13 1.249(4) Å, O3–C13 1.262(4) Å (**15**) and O2–C13 1.267(5) Å, O3–C13 1.249(5) Å (**16**).

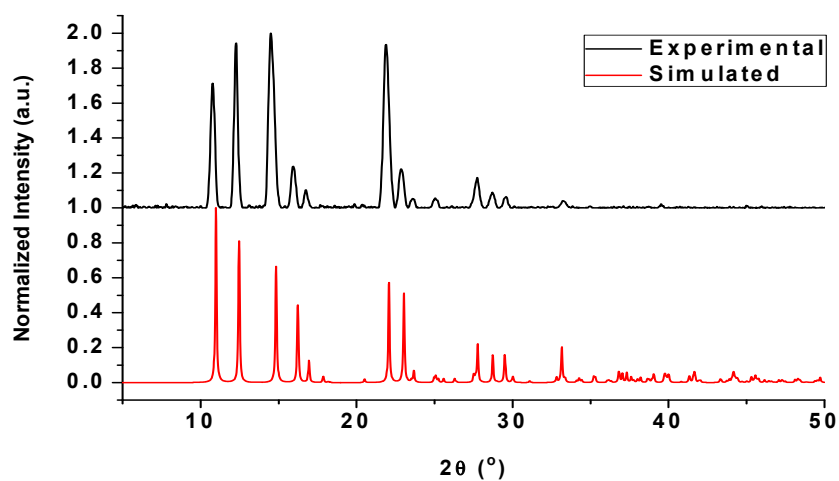

**Fig. S2** Experimental (black) and simulated (red) powder X-ray diffraction (PXRD) pattern for  $[\text{Cu}(\text{hmnH})_2 \cdot \text{DMF} \cdot \text{H}_2\text{O}]_n$  (**8**).

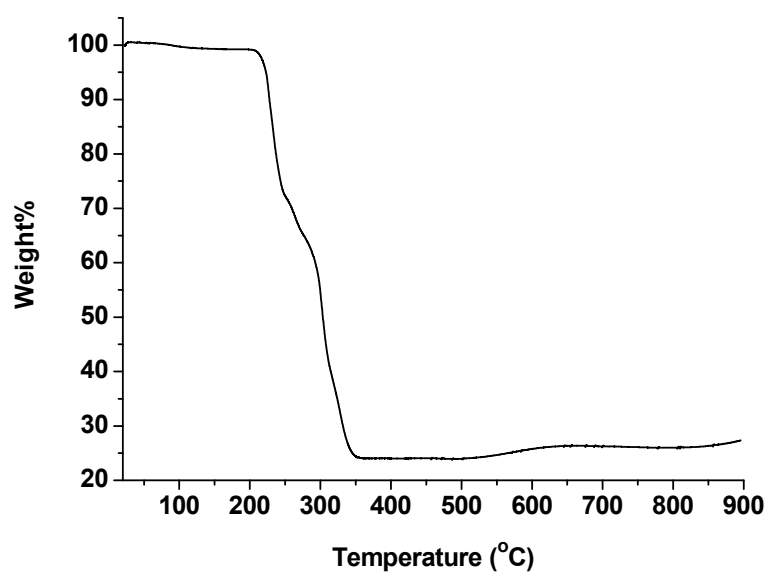

**Fig. S3** TGA curves for  $[\text{Cu}(\text{hmnH})_2 \cdot \text{DMF} \cdot \text{H}_2\text{O}]_n$  (**8**).

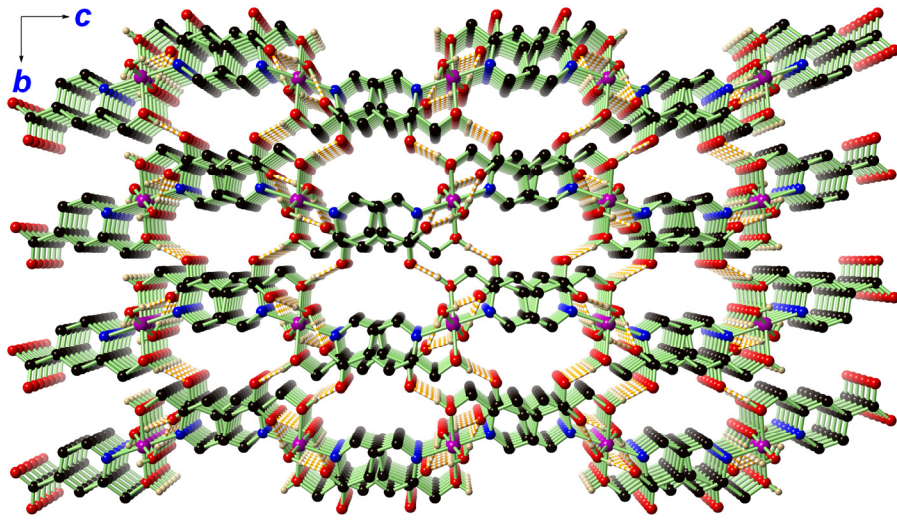

(a)

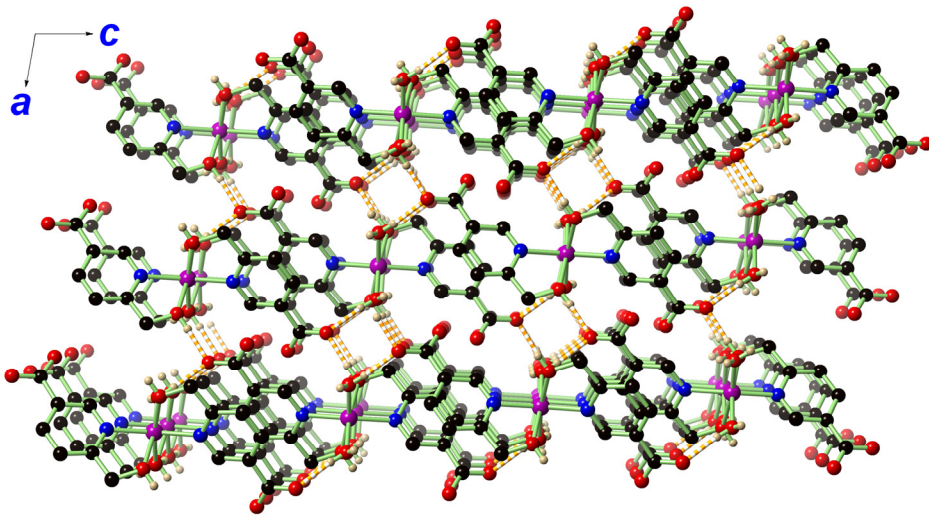

(b)

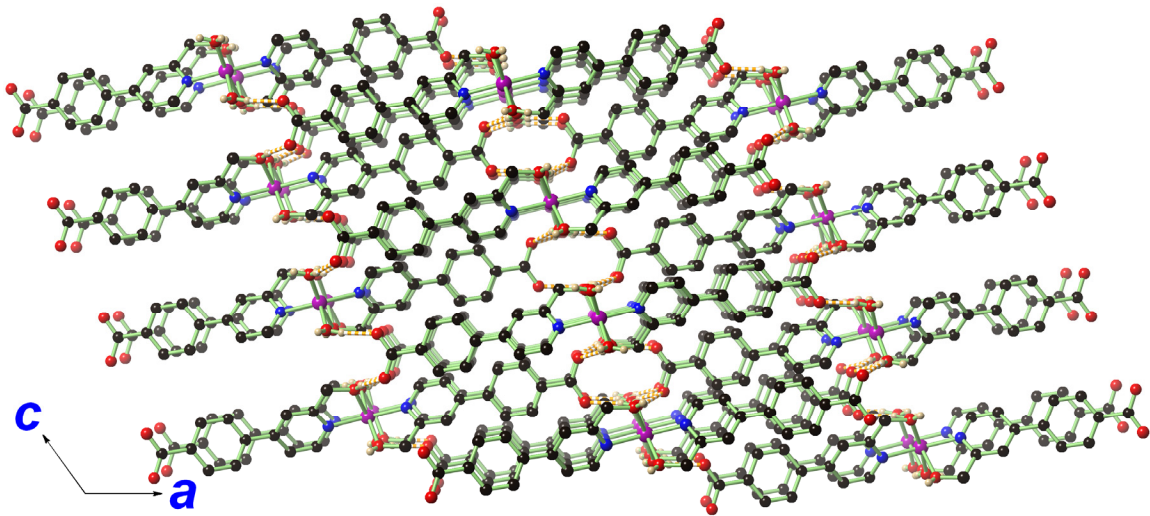

(c)

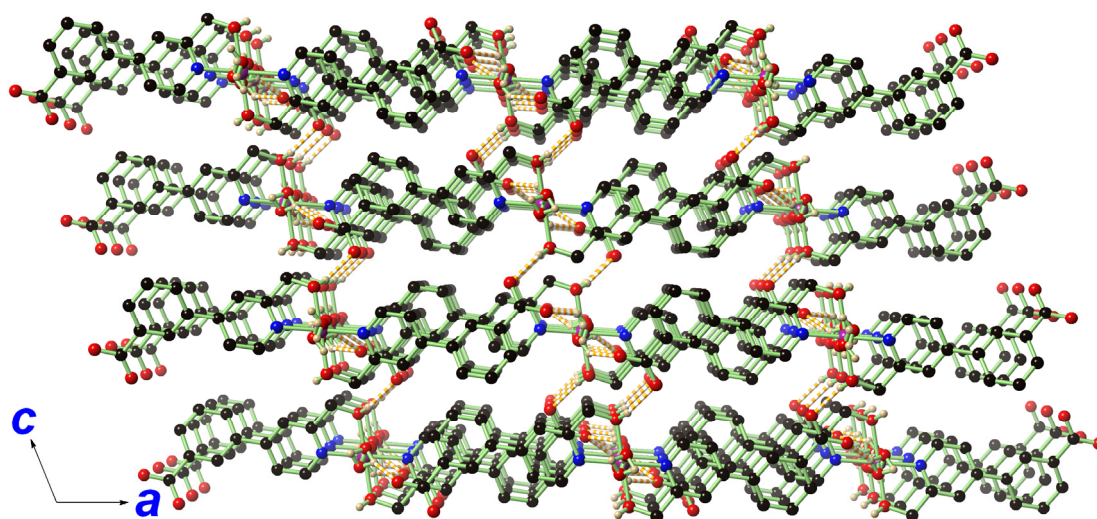

(d)

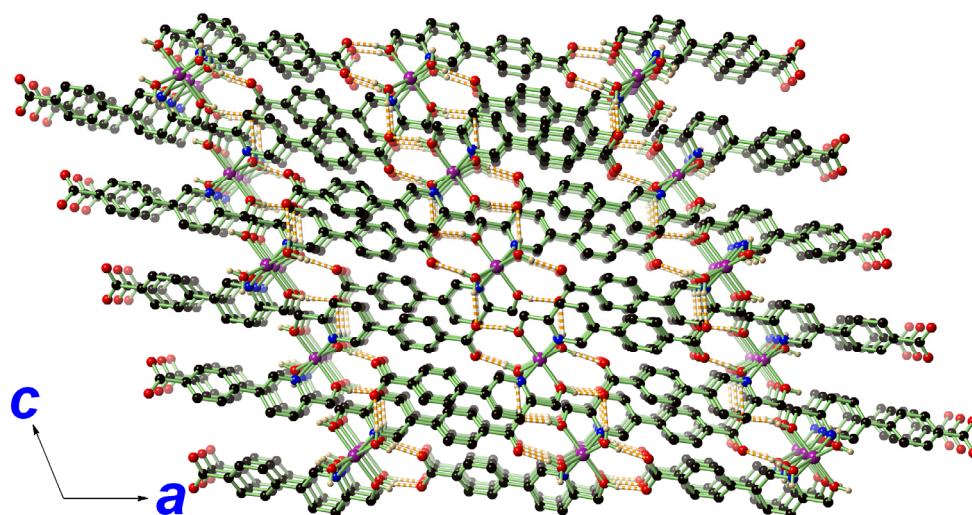

(e)

**Fig. S4** Cell packing diagrams of *trans*-Zn(*iso*-hmnH)<sub>2</sub>(H<sub>2</sub>O)<sub>2</sub> (**1**) (a), *cis*-[Zn(hmnH)<sub>2</sub>(H<sub>2</sub>O)<sub>2</sub>]<sub>2</sub>·2H<sub>2</sub>O (**2**) (b), *cis*-Zn(4,2,4-hpbH)<sub>2</sub>(H<sub>2</sub>O)<sub>2</sub> (**12**) (c), *trans*-Zn(3,2,4-hpbH)<sub>2</sub>(H<sub>2</sub>O)<sub>2</sub> (**13**) (d) and *cis*-Zn(4,6,3-hpbH)<sub>2</sub>(H<sub>2</sub>O)<sub>2</sub>·H<sub>2</sub>O (**14**) (e) showing intensive hydrogen bonding interactions among these zwitterions.

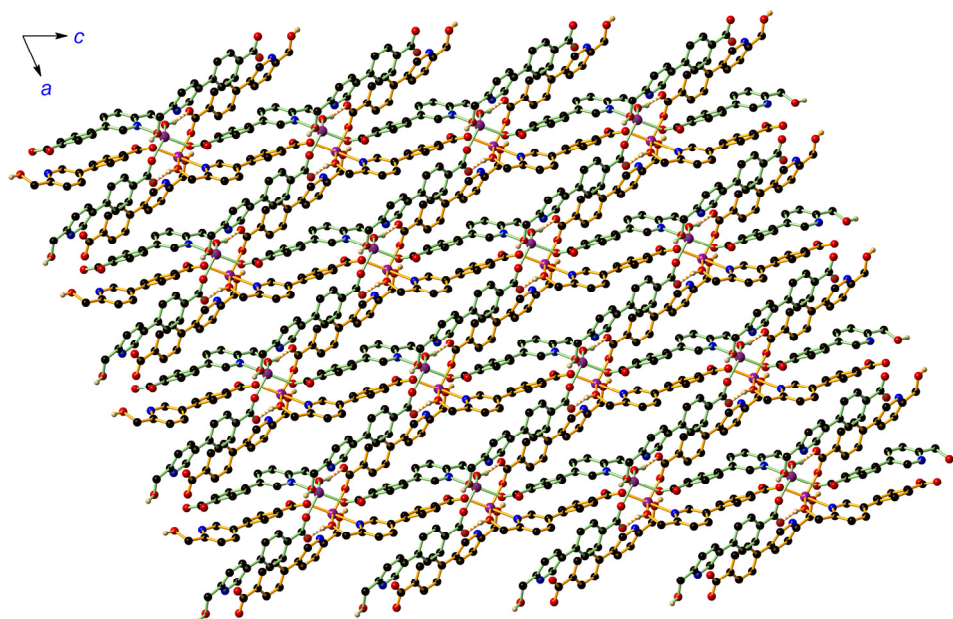

(a)

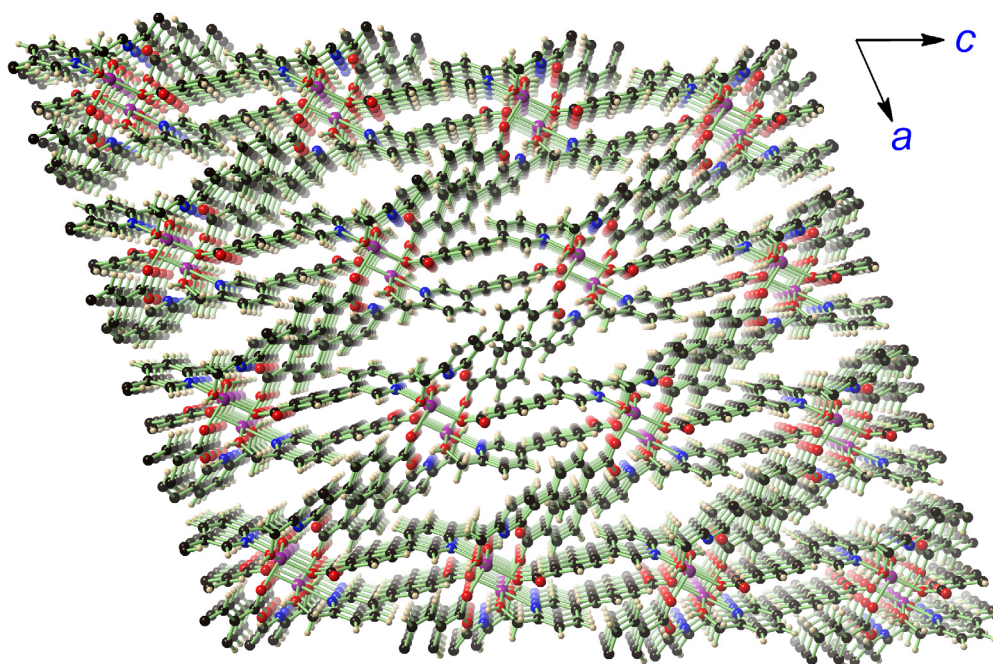

(b)

**Fig. S5** Crystal structure of  $[\text{Mn}(4,6,3\text{-hpbH})_2]_n$  (**17**) looking along the  $b$  direction showing, a) two adjacent layers (orange and bamboo) associated by hydrogen bonding interactions and b) cell packing diagrams.
